# Supplementary material for: Retinol saturase coordinates liver metabolism by regulating ChREBP activity
Source: Springer Nature journal article supplement (doi:10.1038/s41467-017-00430-w), 2017-08-24
Supplement: MOESM1 [file 41467_2017_430_MOESM1_ESM.pdf › 41467_2017_430_MOESM1_ESM.pdf]

### **Description of Supplementary Files**

File name: Supplementary Information

Description: Supplementary figures and supplementary tables.

File name: Peer review file

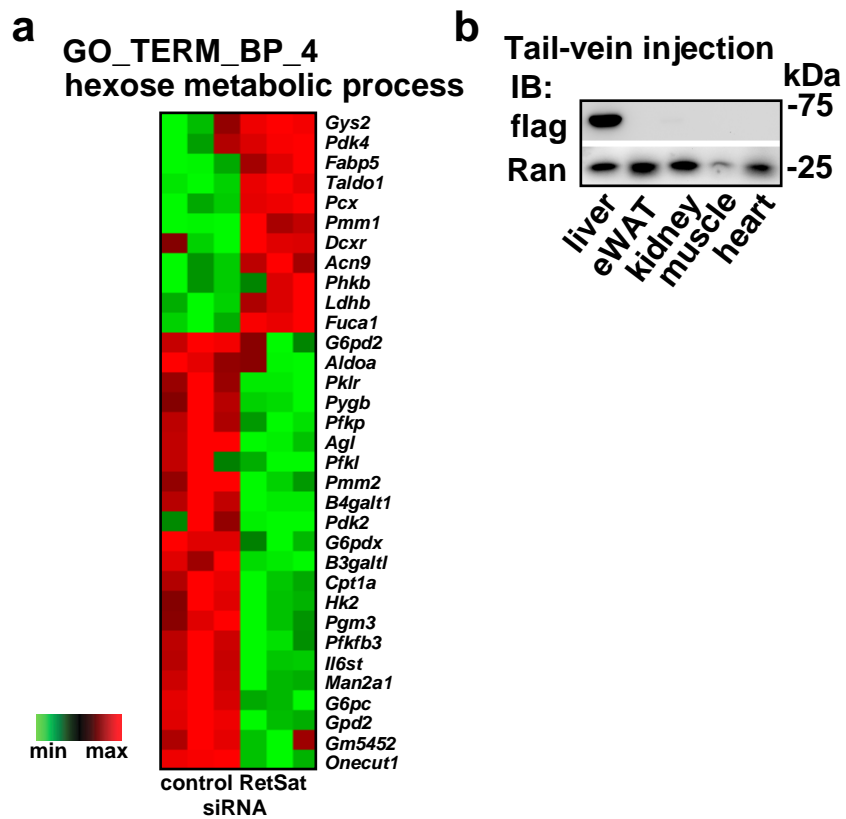

**Supplementary Figure 1 | RetSat depletion alters the expression of genes involved in glucose metabolism and liver specificity of adenoviral expression in mice. (a)** An expression heatmap of regulated genes mapped to GO\_TERM\_BP\_4 'hexose metabolic process' by RetSat depletion in primary hepatocytes. **(b)** An adenovirus expressing a flag-tagged protein was injected via the tail-vein and protein expression in the indicated organs was determined 72 h later by immunoblotting.

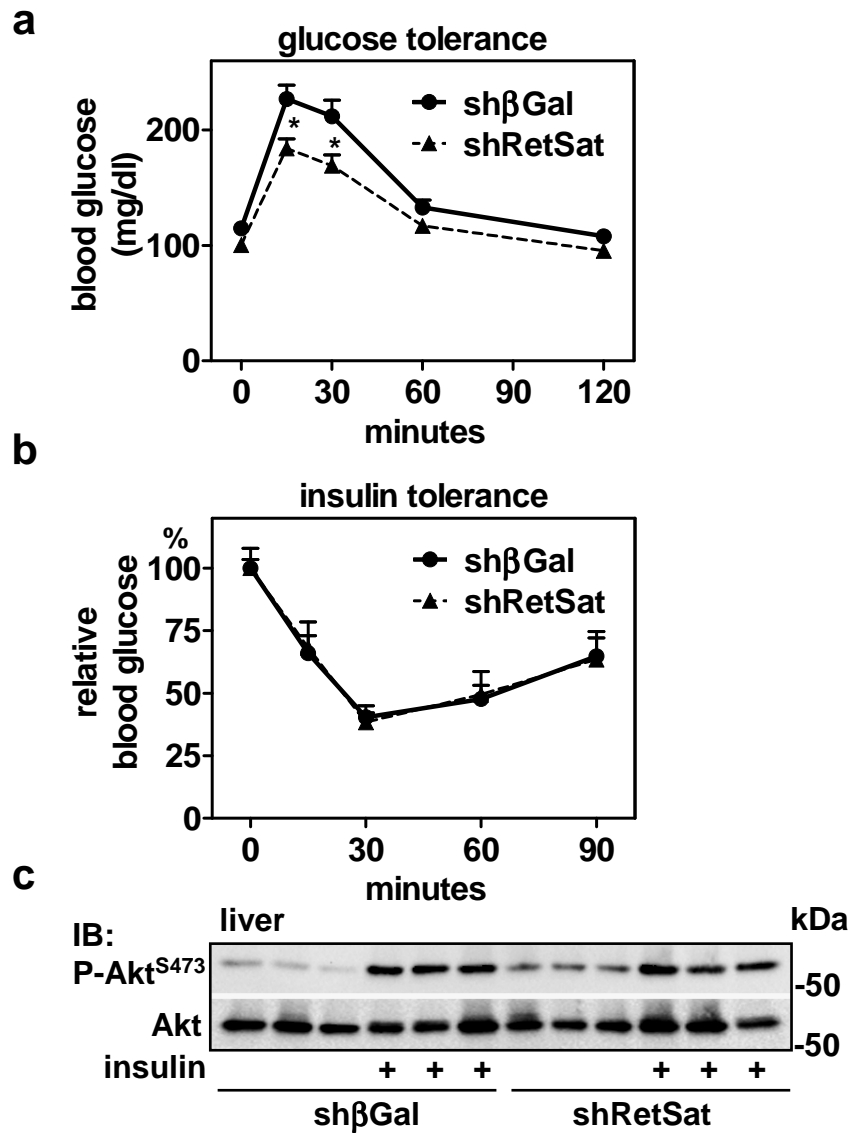

**Supplementary Figure 2 | Glucose and insulin tolerance of mice depleted of hepatic RetSat.** Mice fed HS/HFD were depleted of hepatic RetSat by adenoviral expression of shβGal or shRetSat and (a) glucose and (b) insulin tolerance determined. Data are shown as mean ± s.e.m., n=8 (shβGal), 6 (shRetSat); \* $P < 0.05$  between shβGal and shRetSat by two-way RM ANOVA with Bonferroni post test. (c) Mice fed HS/HFD were depleted of hepatic RetSat by adenoviral expression of shβGal or shRetSat and injected intraperitoneally with 0.9% saline with or without 1U/kg insulin. 10 min later, mice were euthanized and hepatic expression of the indicated proteins determined.

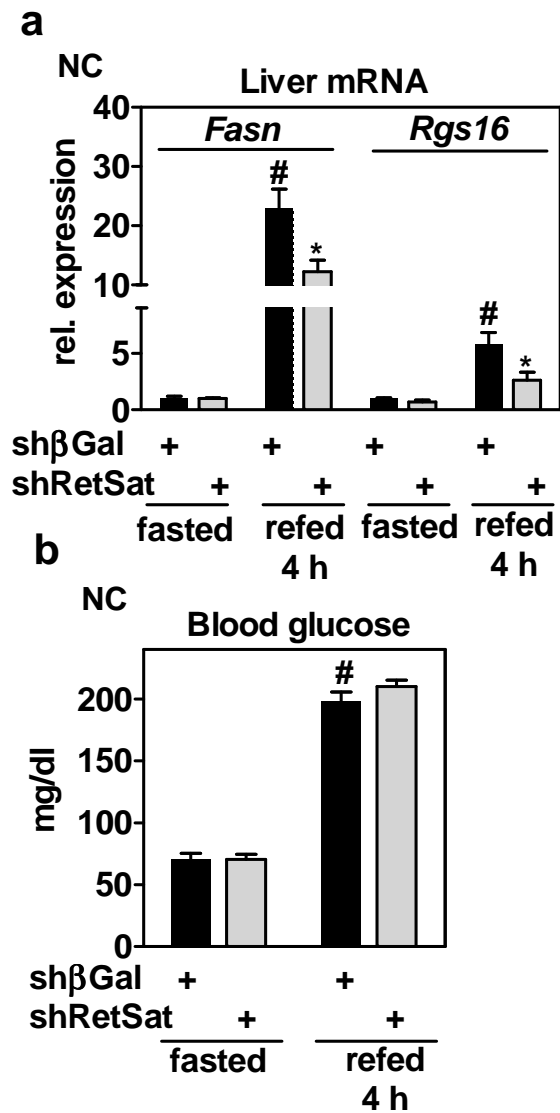

**Supplementary Figure 3 | RetSat depletion in mice fed NC impairs the induction of ChREBP target genes upon re-feeding, independently of blood glucose levels (a)** Mice fed NC were injected with adenoviruses expressing siRNA targeting βGal or RetSat. 5 days later, mice were fasted for 24 h and re-fed with NC for 4 h. mRNA expression of *Fasn* and *Rgs16* was determined by qPCR. **(b)** Fasted and re-fed blood glucose levels of mice described in **(a)**. Data are shown as mean ± s.e.m of n=5 (fasted shβGal), 5 (fasted shRetSat), 8 (refed shβGal), 7 (refed shRetSat); two-way ANOVA with Bonferroni post test showed significances between fasted and re-fed mice (<sup>#</sup>*P*<0.05) and between shβGal and shRetSat (<sup>\*</sup>*P*<0.05) as indicated.

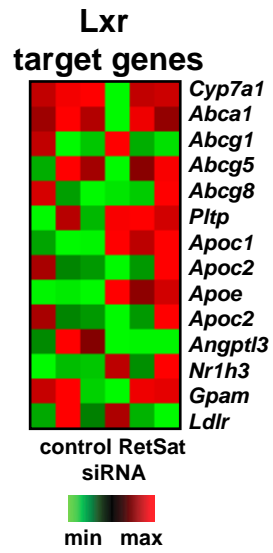

**Supplementary Figure 4 | Effects of RetSat depletion on Lxr $\alpha$  target gene expression.** An expression heatmap of selected Lxr $\alpha$  target genes in primary hepatocytes with or without RetSat depletion.

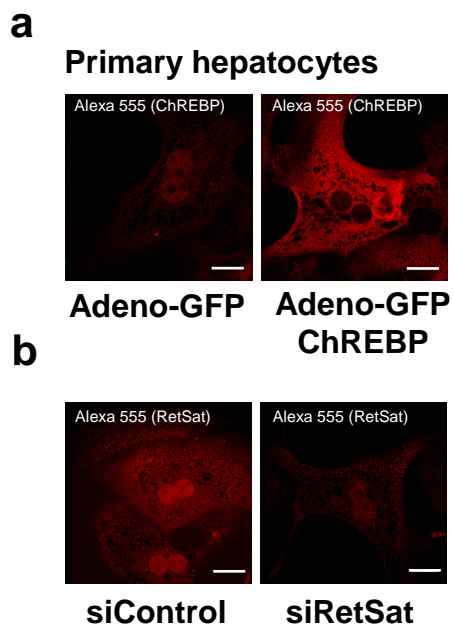

**Supplementary Figure 5 | Validation of ChREBP antibody and RetSat depletion. (a)** Primary hepatocytes were seeded on glass cover slips and treated with adenoviruses expressing GFP or a GFP-ChREBP fusion for 48 h. After fixation, ChREBP was stained by immunocytochemistry and analyzed by confocal microscopy. **(b)** Primary hepatocytes were seeded on cover slips and treated with Control or RetSat siRNA for 48 h. After fixation, endogenous RetSat was stained by immunohistochemistry and analyzed by confocal microscopy, scale bars = 20  $\mu$ M.

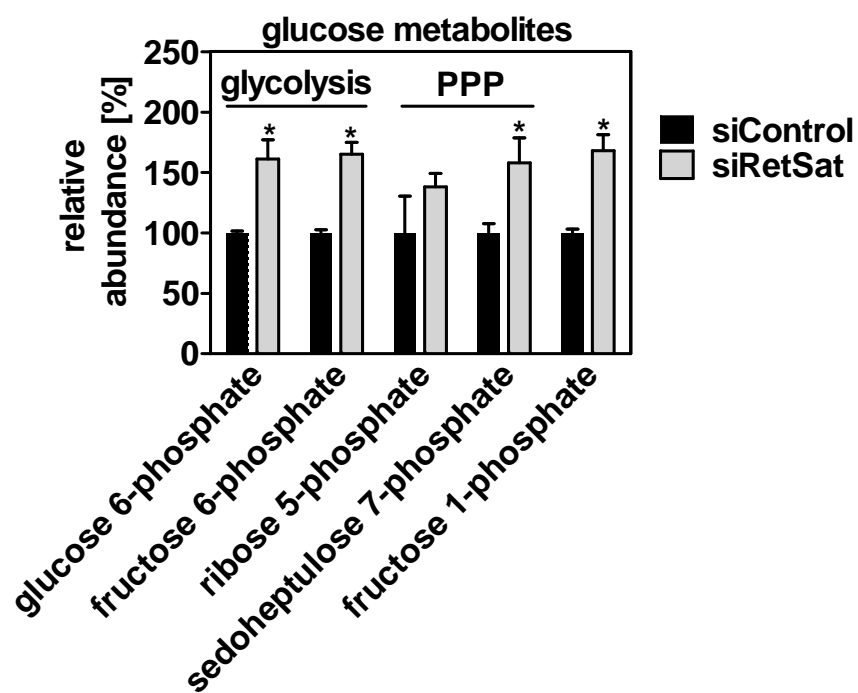

**Supplementary Figure 6 | RetSat depletion in primary hepatocytes leads to an accumulation of glucose metabolites.** Relative abundance of glucose metabolites in siControl or siRetSat treated hepatocytes was assessed by mass spectroscopy. Data are shown as mean  $\pm$  s.d., n=4 independent transfections of hepatocyte cultures from the same mouse; \* $P$ <0.05 by two-tailed  $t$  test.

## BioGPS

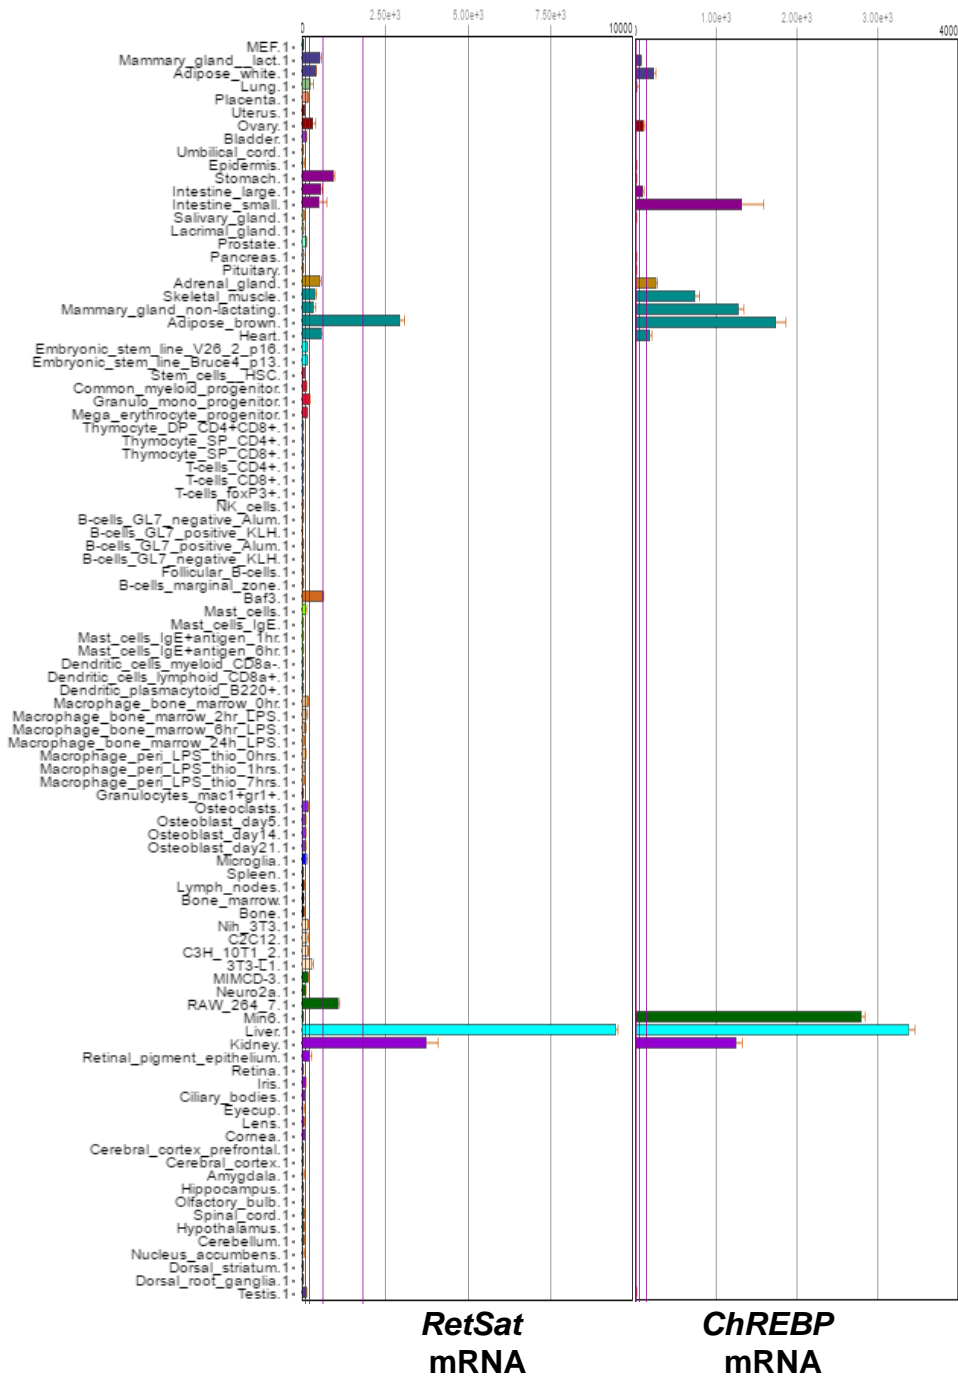

**Supplementary Figure 7 | Comparison mRNA expression profile of *RetSat* and *ChREBP*.** Gene expression profiles of murine *RetSat* and *ChREBP* from BioGPS (probesets 1424715\_at and 1419185\_a\_at, respectively).



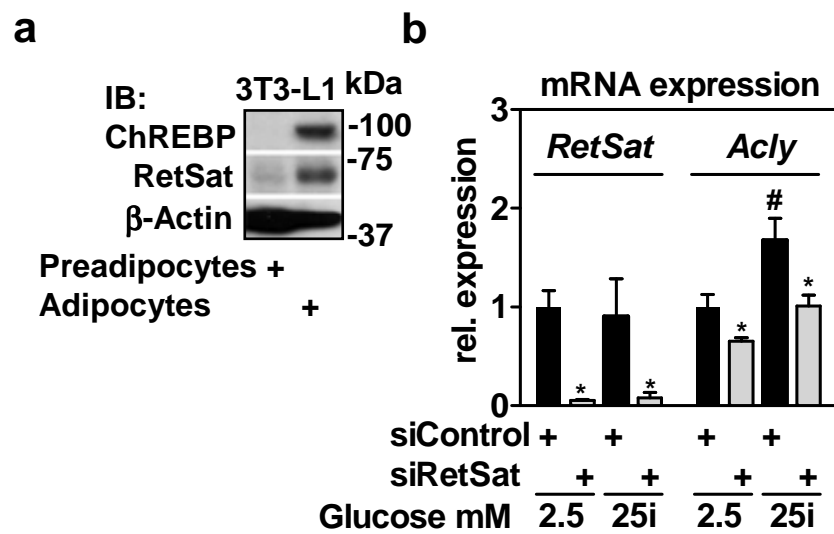

**Supplementary Figure 8 | Expression of RetSat and ChREBP proteins in 3T3-L1 adipocytes and impaired glucose sensing in adipocytes depleted of RetSat.** (a) RetSat and CHREBP protein expression in undifferentiated and differentiated 3T3-L1 adipocytes was determined by immunoblotting. (b) 3T3-L1 were electroporated with control or RetSat siRNA and 24 h later exposed to either low or high glucose concentrations and 100 nM insulin as indicated. After an additional 24 h, mRNA expression of *RetSat* and *Acly* was determined by qPCR. Data are shown as mean  $\pm$  s.d., n=6 independent transfections of 3T3-L1 adipocytes; two-way ANOVA with Bonferroni post test revealed significances between low and high glucose concentrations (# $P$ <0.05) and between siControl and siRetSat (\* $P$ <0.05).

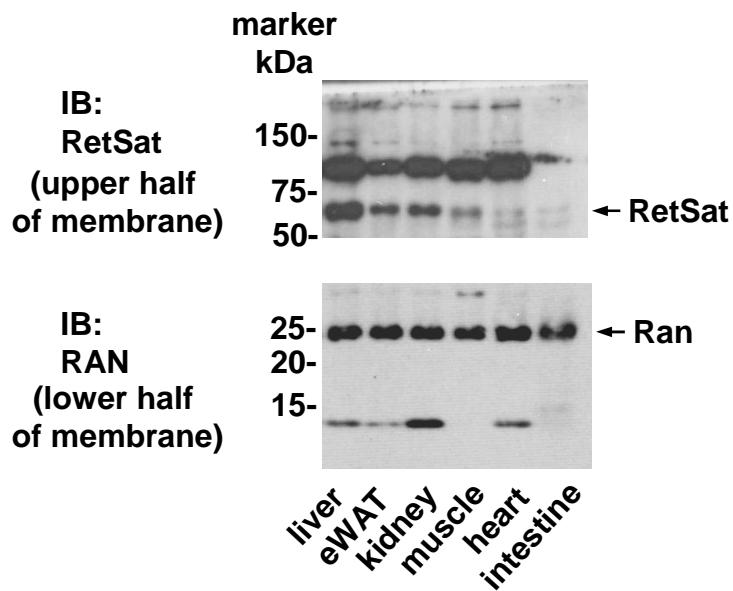

Supplementary Figure 9 | Immunoblot scan of Fig. 1a

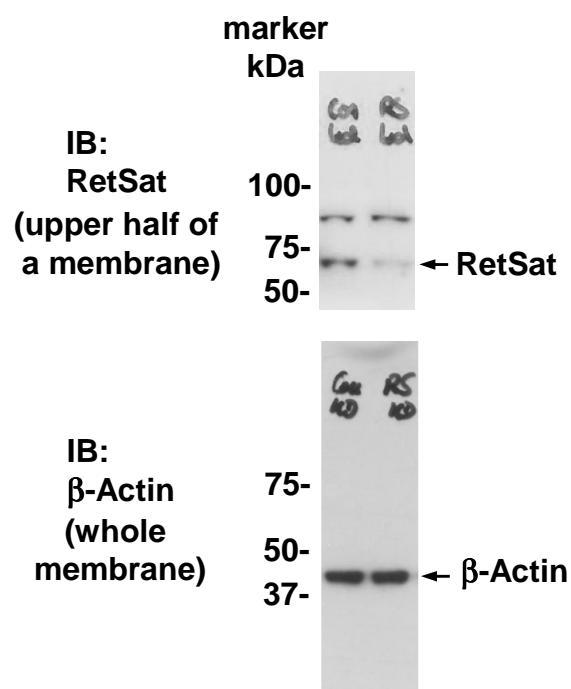

Supplementary Figure 10 | Immunoblot scan of Fig. 1b

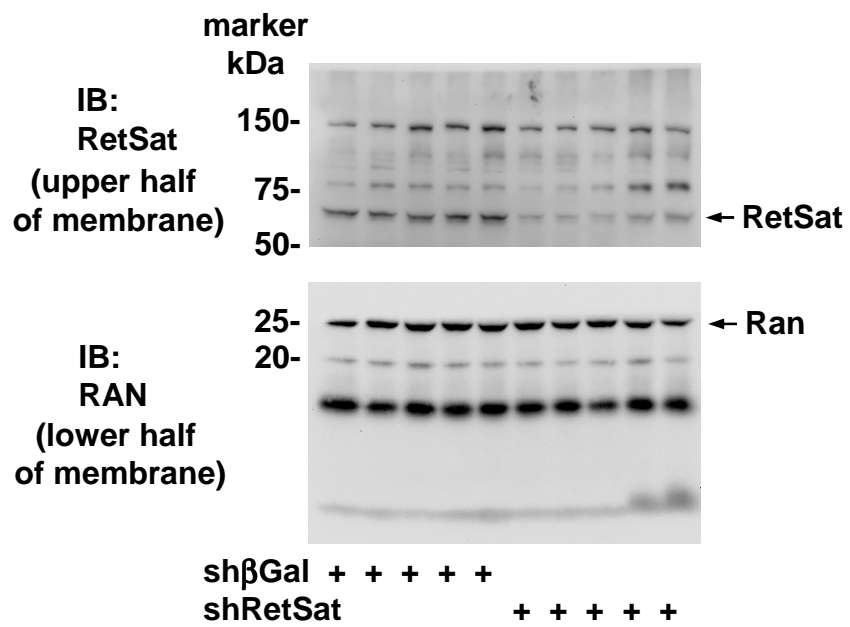

Supplementary Figure 11 | Immunoblot scan of Fig. 2b

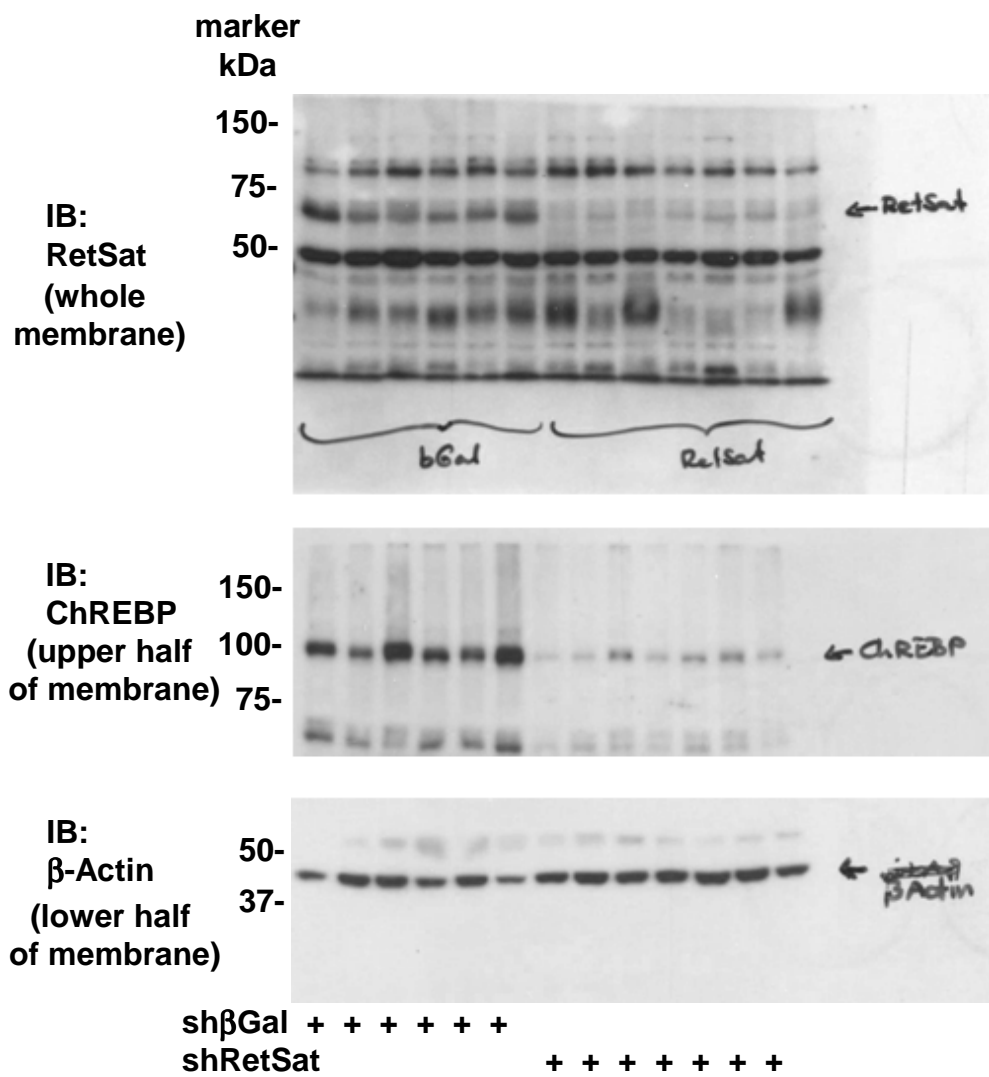

Supplementary Figure 12 | Immunoblot scan of Fig. 4b

**Supplementary Table 1.**

**Metabolic parameters of NC-fed sh $\beta$ Gal and shRetSat mice (mean  $\pm$  s.e.m.)**

|                                            | <b>sh<math>\beta</math>Gal (n=13)</b> | <b>shRetSat (n=12)</b> |
|--------------------------------------------|---------------------------------------|------------------------|
| <i>ad libitum</i><br>blood glucose (mg/dl) | 166.85 $\pm$ 4.32                     | 173.45 $\pm$ 8.76      |
| fasted<br>blood glucose (mg/dl)            | 70.85 $\pm$ 4.60                      | 70.5 $\pm$ 5.14        |
| <i>ad libitum</i><br>insulin (ng/ml)       | 0.87 $\pm$ 0.15                       | 0.47 $\pm$ 0.18        |
| <i>ad libitum</i><br>serum TGs (mg/dl)     | 176 $\pm$ 9.33                        | 184 $\pm$ 15.51        |
| <i>ad libitum</i><br>serum NEFA (mM)       | 1.92 $\pm$ 0.06                       | 1.92 $\pm$ 0.09        |

## Supplementary Table 2.

### Human subject characteristics (mean $\pm$ s.e.m.)

|                            |                |
|----------------------------|----------------|
| n (male)                   | 29 (12)        |
| age (years)                | 60 $\pm$ 3     |
| BMI (kg/m <sup>2</sup> )   | 27.1 $\pm$ 1.2 |
| waist circumference (cm)   | 98 $\pm$ 3     |
| SBP (mm Hg)                | 137 $\pm$ 4    |
| DBP (mm Hg)                | 73 $\pm$ 3     |
| ALT (U/L)                  | 40.6 $\pm$ 5.9 |
| NAFLD activity score (0-8) | 1.6 $\pm$ 0.3  |
| Liver steatosis (%)        | 14.5 $\pm$ 3.1 |

### Supplementary Table 3.

#### Oligonucleotide sequences used in this study (5'-3')

|      |                     |                          |
|------|---------------------|--------------------------|
| qPCR | m36B4 fw            | TCATCCAGCAGGTGTTTGACA    |
|      | m36B4 rv            | GGCACCGAGGCAACAGTT       |
|      | mAcc1 fw            | GGTGAAGCTGGACCTAGAAGAGAA |
|      | mAcc1 rv            | AAAGGCCAAACCATCCTGTAAGC  |
|      | mAcly fw            | GATCTGGACCATGGTTGCT      |
|      | mAcly rv            | CCGTAATTCGCCAGTTCATT     |
|      | mAdipor2 fw         | GGGTCTCCCGACTCTTCTCT     |
|      | mAdipor2 rv         | GAAGCAAGGTTGTGGGTTACA    |
|      | mBhlhe40 fw         | CAGCTGAAGGATCTCCTACCC    |
|      | mBhlhe40 rv         | TCAATGCTTTCACGTGCTTC     |
|      | mChREBPtotal fw     | CAGCCCAGCCTAGATGACTT     |
|      | mChREBPtotal rv     | CAAAGCTGGGGGACTCTATG     |
|      | mChREBP $\alpha$ fw | CGACACTCACCCACCTCTTC     |
|      | mChREBP $\alpha$ rv | TTGTTCCAGCCGGATCTTGTC    |
|      | mChREBP $\beta$ fw  | TCTGCAGATCGCGTGGAG       |
|      | mChREBP $\beta$ rv  | CTTGTCCCGGCATAGCAAC      |
|      | mDgat1 fw           | GATCTGAGGTGCCATCGTCT     |
|      | mDgat1 rv           | GGATCAGCATCACCACACAC     |
|      | mElovl6 fw          | AAAGCACCCGAACTAGGTGA     |
|      | mElovl6 rv          | AGGAGCACAGTGATGTGGTG     |
|      | mFasn fw            | CACCAATACAGATGGCAGCA     |
|      | mFasn rv            | CCAGCTGGCTGATACAGAGA     |
|      | mG6pc fw            | CGAGGAAAGAAAAAGCCAAC     |
|      | mG6pc rv            | GGGACAGACAGACGTTTCAGC    |
|      | mGck fw             | CTTCCCTGTAAGGCACGAAG     |
|      | mGck rv             | AAGTCCCACGATGTTGTTCC     |
|      | mLxra fw            | CTGCCAGCAACAGTGTAAC      |
|      | mLxra rv            | CTGAGGGTCCGGTGCAAT       |
|      | mMid1ip1 fw         | GGTGAACAACATGGACCAGA     |
|      | mMid1ip1 rv         | CGCTGACCTCGTCTATCTCC     |
|      | mPfk1 fw            | CATATATGTGGGGGCCAAAG     |
|      | mPfk1 fw            | CATATATGTGGGGGCCAAAG     |
|      | mPfk1 rv            | AGTTGGCTGGCTTGATGTTT     |
|      | mPfk1 rv            | AGTTGGCTGGCTTGATGTTT     |
|      | mRetSat fw          | CCCATCAAGCAAGGATCCAA     |
|      | mRetSat rv          | ATGGGTACCAGCGCAGTCA      |
|      | mRgs16 fw           | TGGGCCAGTAAGCATAACAA     |
|      | mRgs16 rv           | TTCAGCAGCAAATCGAAAGA     |
|      | mScd1 fw            | CCGGGAGAATATCCTGGTTT     |
|      | mScd1 rv            | GCGGTACTCACTGGCAGAGT     |
|      | mSrebp1c fw         | GCGCTACCGGTCTTCTATCA     |
|      | mSrebp1c rv         | TGCGCAAGACAGCAGATTTA     |
|      | mTpi fw             | CTGGATCCCAAATTGCTGT      |
|      | mTpi rv             | ACCCAGGTGGCTCCTAAGTC     |
|      | mTxnip fw           | GGTCTCAGCAGTGCAAACAG     |
|      | mTxnip rv           | GGCCTCATGATCACCATCTC     |



|                              |                |                             |
|------------------------------|----------------|-----------------------------|
|                              |                |                             |
|                              | hACC1 fw       | ACCACCTACGGATAGACCGC        |
|                              | hACC1 rv       | TCGCTTTGGGGAAATAAAGTG       |
|                              | hHPRT fw       | TGACACTGGCAAACAATGCA        |
|                              | hHPRT rv       | GGTCCTTTTCACCAGCAAGCT       |
|                              | hPKLR fw       | GCCTACTGGACATTGACTCCGA      |
|                              | hPKLR rv       | TCATCCCGGCCTTGATCAT         |
|                              | hRetSat fw1    | CAGGACTGTTCAACACCTATGAACA   |
|                              | hRetSat rv1    | CCCCAGTTGCTGCTTCACA         |
|                              | hRetSat fw2    | GGATGTGGTGGTAATTGGCAGT      |
|                              | hRetSat rv2    | CCCCTGCCTTGGTATGTTGTT       |
|                              |                |                             |
| <b>siRNA (ds)</b>            | Control siRNA  | UAG-CGA-CUA-AAC-ACA-UCA-AUU |
|                              | Retsat siRNA-1 | UCA-GCC-GAG-UAC-CAG-AGA-AUU |
|                              | Retsat siRNA-2 | GCU-CAA-AGG-UCA-AGG-CAC-AUU |
|                              |                |                             |
| <b>shRNA target sequence</b> | $\beta$ Gal    | CTACACAAATCAGCGATTT         |
|                              | RetSat         | TCAGCCGAGTACCAGAGAA         |
